# Supplementary material
Source: PubMed Central journal article supplement (PMC3436587)

## SUPPLEMENTARY FIGURE LEGENDS

### FIGURE 1:

A; MG activated human TRPA1 receptors expressed in HEK 293t cells. All cells responding to 1  $\mu$ M or 3 mM MG also showed an increase in intracellular calcium upon stimulation with carvacrol (250  $\mu$ M, 30 s) which was used as an index of successful transfection. B; when applied to untransfected HEK 293t cells 10 mM MG did not evoke any responses (n=502), but the same concentration led to biphasic calcium transients in cells expressing the hTRPA1-3C mutant (n=668). The first phase of the response was absent in the hTRPA1-K710Q mutant (n = 161) and resembles calcium transients evoked by 1 mM MG in the hTRPA1-3C mutant (lower panel n = 110). The hatched area (upper panel) indicates the different activation kinetic due to the lysine at position 710 of hTRPA1, especially at high MG concentration. C; summary of 10 mM MG effects on hTRPA1 mutants. The K710R (light grey) is more sensitive to MG compared to the K710Q mutant (light blue). The same applies to the hTRPA1-3C/K710R (black column) mutation compared to the hTRPA1-3C/K710Q mutant (dark blue) in which responsiveness to 10 mM MG is largely lost.

### FIGURE 2:

*ESI-TOF mass spectrometry analysis of the MG-induced changes in the course of the reaction.*

A; experimentally obtained isotope distribution for the synthetic peptide (black) compared with calculated isotope distribution (red). B; deconvoluted spectrum of the peptide after the treatment with MG 500  $\mu$ M for 15 min. The native peptide remains the most intense peak (monoisotopic  $m/z$  7661.50). For selected  $m/z$  regions with peak assignments see Figure 3B, a detailed list is provided in suppl. Table 1. C; spectrum of the  $m/z$  3300-3500 region. The peptide fragment 17-45, present in the control spectrum of untreated peptide is shifted by 2 mass units in the MG treated sample (black: native, monoisotopic  $m/z$  3421.42, red: MG-treated, monoisotopic  $m/z$  3419.40) signifying the loss of 2H and the formation of a disulfide bond. The treated sample also shows the peak at  $m/z$  3380.42 (green) corresponding to addition of MG to the fragment 18-45. D; following the nucleophilic attack of neighboring thiol to hemithioacetal, disulfide is formed with elimination of hydroxyacetone (see Figure 8). As a proof-of-concept we incubated 1 M DTT with 0.3 M MG and detected the resulting ketoalcohol as shown by obtained (black) and predicted (red) spectra of  $[\text{CH}_2(\text{OH})\text{C}(\text{O})\text{CH}_3 + \text{Na}]^+$ .

### FIGURE 3:

*DTT does not influence MG binding to lysine but reduces MG-evoked inward currents in the 3C hTRPA1 mutant:*

Mass spectra of untreated A) lysine (1mM) and lysine following treatment with MG (10 mM) B; reaction of MG with lysine forms  $[\text{K-MG} + \text{NH}_4]^+$  (the chemical structure shown in D) as a main product. C; the same product is detected as dominant peak following DTT application after reaction of lysine and MG. D; reaction scheme depicting the formation of the detected product in the reaction of MG with lysine. E; DTT (5 mM) repeatedly and transiently reduced 3mM MG-induced currents in the hTRPA1-3C mutant indicating that further cysteine residues in the vicinity could be modified by MG and contribute to the responsiveness of hTRPA1-3C at higher MG concentrations.

**SUPPLEMENTARY TABLES:****TABLE 1**

Peptide fragments detected by ESI-TOF mass spectrometry after the exposure of 64 amino acids synthetic peptide to MG (aa 607-670, intracellular N-terminus).

| <b>Unmodified</b> | <b>1 S-S</b> | <b>2 S-S</b> | <b>1MG</b> | <b>2MG</b> | <b>3MG</b> |
|-------------------|--------------|--------------|------------|------------|------------|
| 27-33             | 29-45        | 12-45        | 15-34      | 12-42      | 1-64       |
| 1-13              | 28-45        | 13-45        | 51-62      | 36-60      |            |
| 17-21             | 23-53        | 17-45        | 18-45      | 18-47      |            |
| 7-40              | 33-63        | 1-64         | 26-35      |            |            |
| 1-64              | 24-50        |              | 23-40      |            |            |
| 60-64             |              |              | 20-49      |            |            |
| 26-31             |              |              |            |            |            |

**TABLE 2**

Table of fibre populations and sensory properties, together with response to methylglyoxal stimulation

| strain                | fiber type                 | n  | cv<br>(m/s) | median<br>v. Frey<br>(mN) | pre MG application        |                           | MG 10mM response            |                            |                               | post MG application       |                           |
|-----------------------|----------------------------|----|-------------|---------------------------|---------------------------|---------------------------|-----------------------------|----------------------------|-------------------------------|---------------------------|---------------------------|
|                       |                            |    |             |                           | heat<br>threshold<br>(°C) | cold<br>threshold<br>(°C) | no. of spikes per<br>10 min | response<br>latency<br>(s) | responsive<br>fibers<br>n / n | heat<br>threshold<br>(°C) | cold<br>threshold<br>(°C) |
| C57BL/6               | C-MH                       | 11 | 0.37        | 5.7                       | 40.0 ± 1.1                |                           | 19.4 ± 5.4                  | 45.1 ± 5.4                 | 9 / 11                        | 39.0 ± 2.4                |                           |
|                       | C-MHC                      | 9  | 0.43        | 8                         | 40.8 ± 1.1                | 20.1 ± 2.4                | 63.0 ± 12.5                 | 31.7 ± 10.2                | 9 / 9                         | 41.6 ± 1.6                | 24.9 ± 1.0                |
|                       | C-MC                       | 2  | 0.37        | 6.85                      |                           | 25.6 ± 6.4                | 15.0 ± 2                    | 14.4 ± 6.9                 | 2 / 2                         |                           | 12.6 <sub>(n=1)</sub>     |
|                       | C-M                        | 2  | 0.4         | 3.35                      |                           |                           | 171.5 ± 96.5                | 8.3 ± 1.7                  | 2 / 2                         |                           |                           |
|                       | A δ – RA<br>non-responder  | 8  | 8.2         | 1                         |                           |                           | 1.3 ± 0.6                   |                            | 0 / 8                         |                           |                           |
|                       | A δ – RA<br>responder      | 4  | 9.6         | <1                        |                           |                           | 1082.5 ± 528.5              | 54.0 ± 14.2                | 4 / 4                         |                           |                           |
|                       | A δ - HTM<br>non-responder | 3  | 9.0         | 5.7                       |                           |                           |                             |                            | 0/3                           |                           |                           |
| TRP A1 <sup>-/-</sup> | C-MH                       | 3  | 0.44        | 8                         | 36.1 ± 2.2                |                           | 11.3 ± 5.2                  | 153.5 ± 122.3              | 2 / 3                         | 33.9 ± 1.5                |                           |
|                       | C-MHC                      | 4  | 0.46        | 6.85                      | 39.6 ± 1.8                | 18.22 ± 3.1               | 33.2 ± 3.3                  | 82.1 ± 31.7                | 4 / 4                         | 34.3 ± 4.3                | n.t.                      |
|                       | A δ – HTM<br>non-responder | 1  | 2.1         | 8                         |                           |                           |                             |                            | 0/8                           |                           |                           |

C-MH, mechano-, heat-sensitive; C-MHC, mechano-, heat-, cold-sensitive; C-MC, mechano-cold sensitive; C-M, mechano-sensitive; HTM, high threshold mechano-sensitive; n.t. not tested

SUPPLEMENTARY FIGURE 1

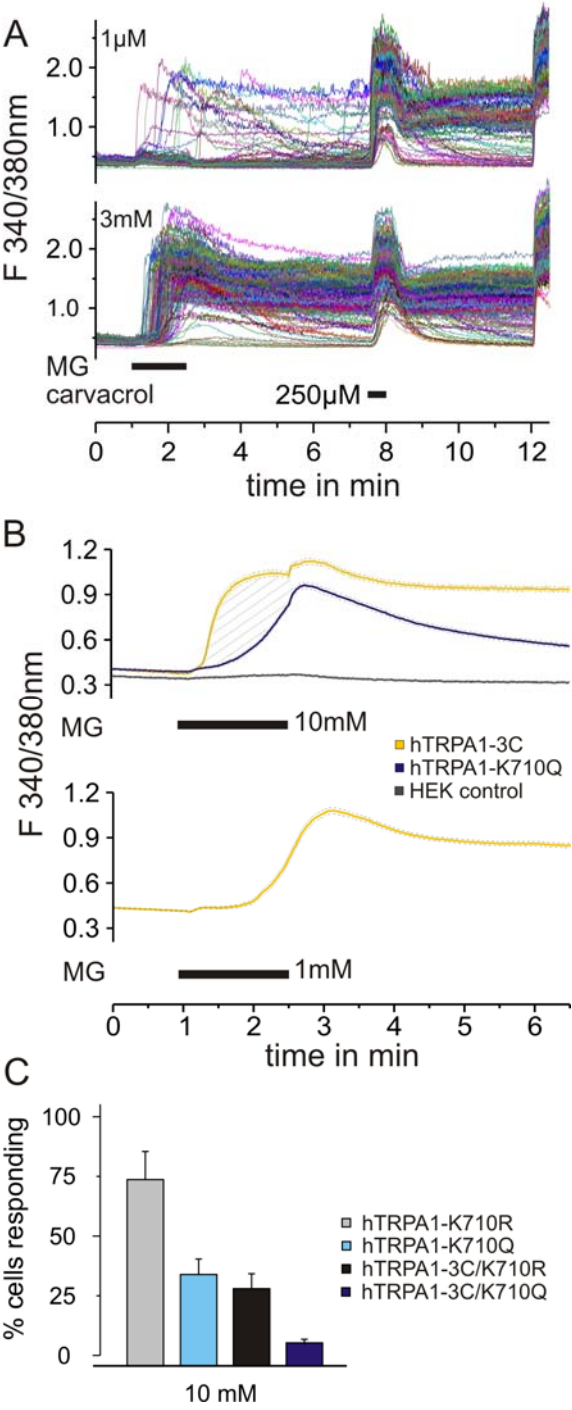

SUPPLEMENTARY FIGURE 2

A

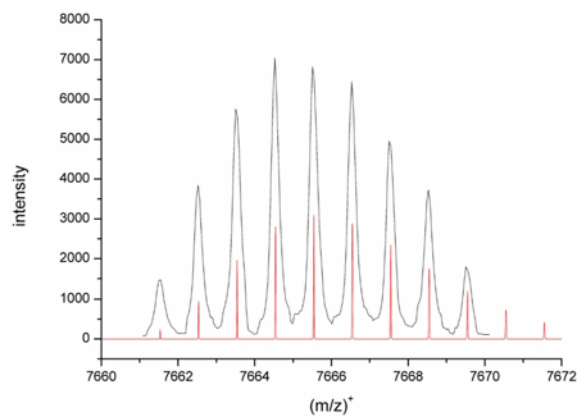

B

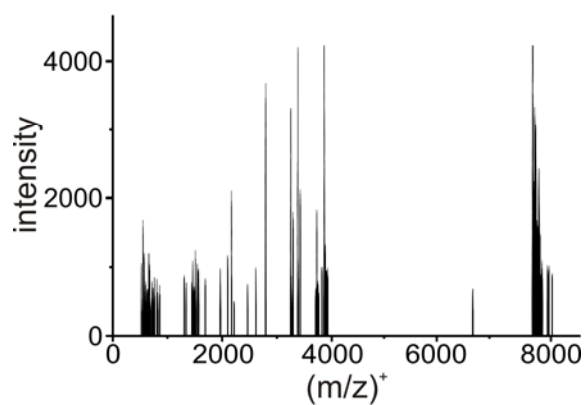

C

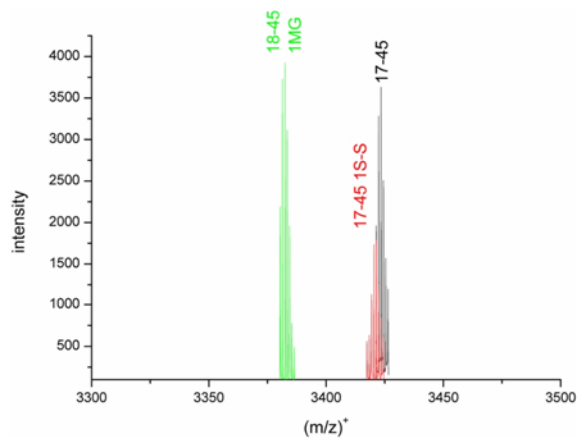

D

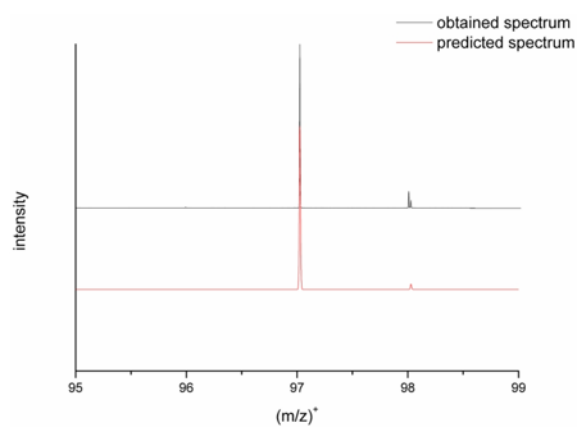

SUPPLEMENTARY FIGURE 3

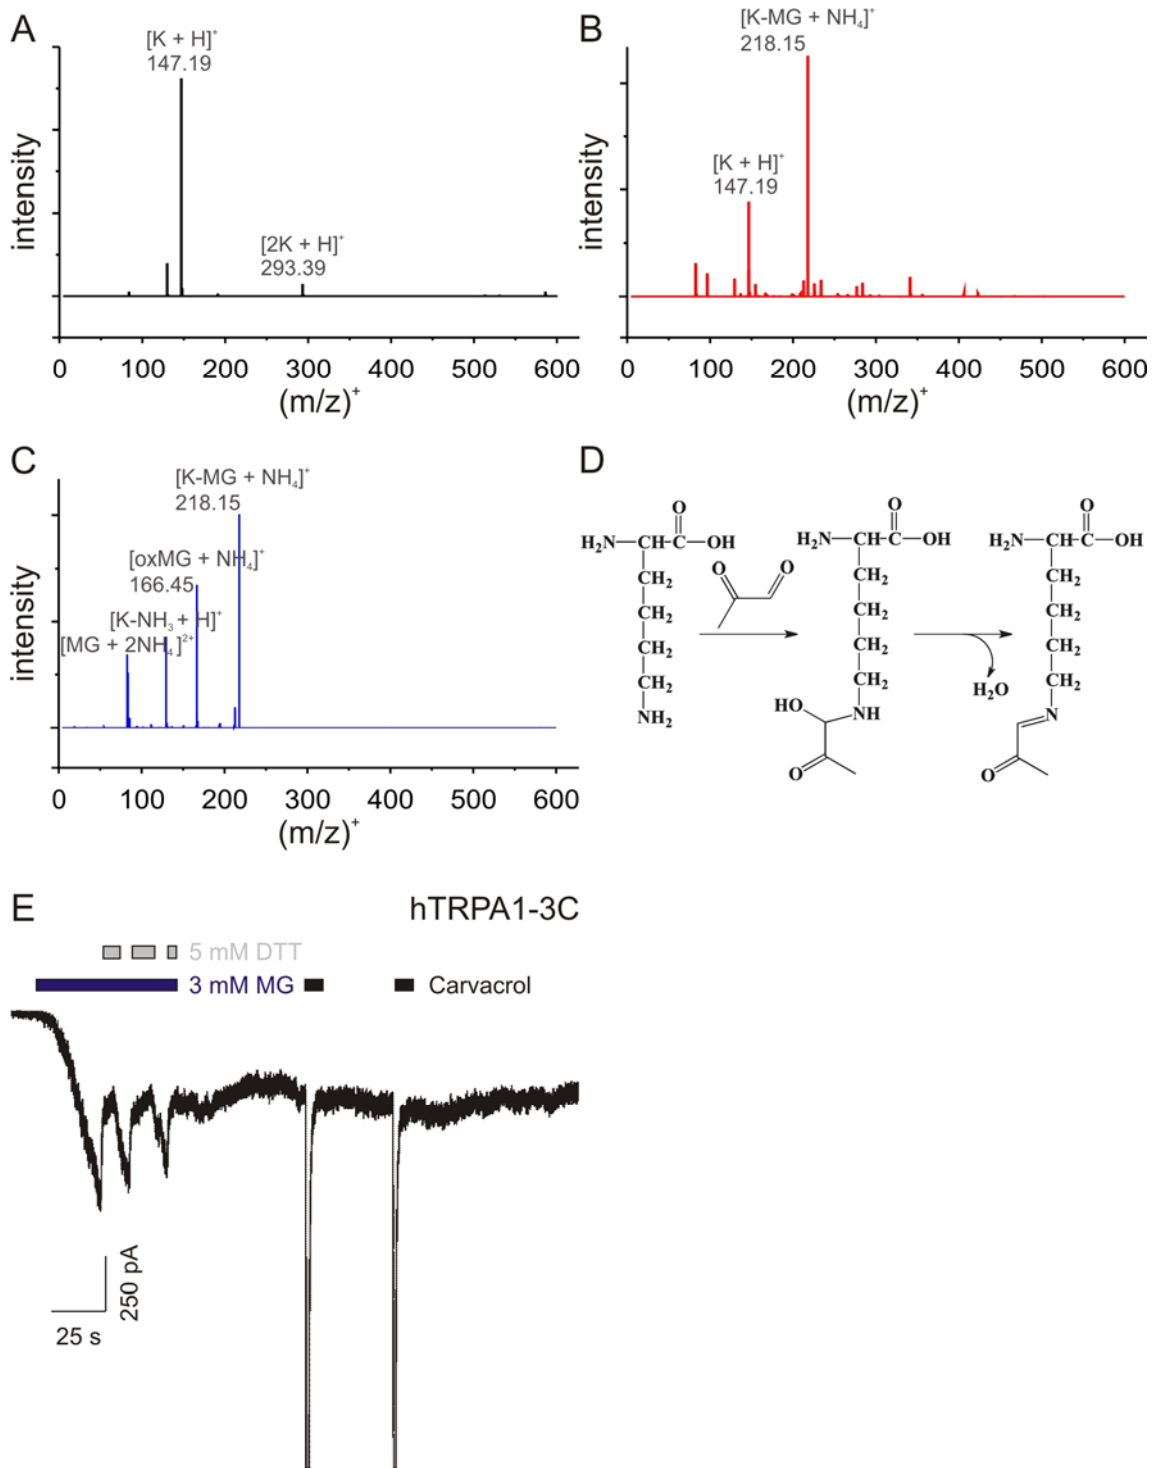

Supplement: supp_M111.328674_jbc.M111.328674-1.pdf [file supp_M111.328674_jbc.M111.328674-1.pdf]
